# Supplementary material for: Honeycomb-like NiO/ZnO heterostructured nanorods: photochemical synthesis, characterization, and enhanced UV detection performance
Source: Royal Society of Chemistry journal article supplement (doi:10.1039/c4tc00157e), 2014-01-01
Supplement: c4tc00157e1.pdf [file c4tc00157e1.pdf]

## **Supporting Information**

### **Honeycomb-like NiO/ZnO Heterostructured Nanorods: Photochemical Synthesis, Characterization, and Enhanced UV Detection Performance**

Wen Dai, Xinhua Pan\*, Shanshan Chen, Cong Chen, Zhen Wen, Honghai Zhang and  
Zhizhen Ye\*

State Key Laboratory of Silicon Materials, Cyrus Tang Center for Sensor Materials  
and Applications, Zhejiang University, Hangzhou, 310027, P.R. China. Tel: +86-571-  
87952187; Fax: +86-571-87952124; E-mail: panxinhua@zju.edu.cn;  
yeyz@zju.edu.cn.

## Supporting Information I: Experiment process

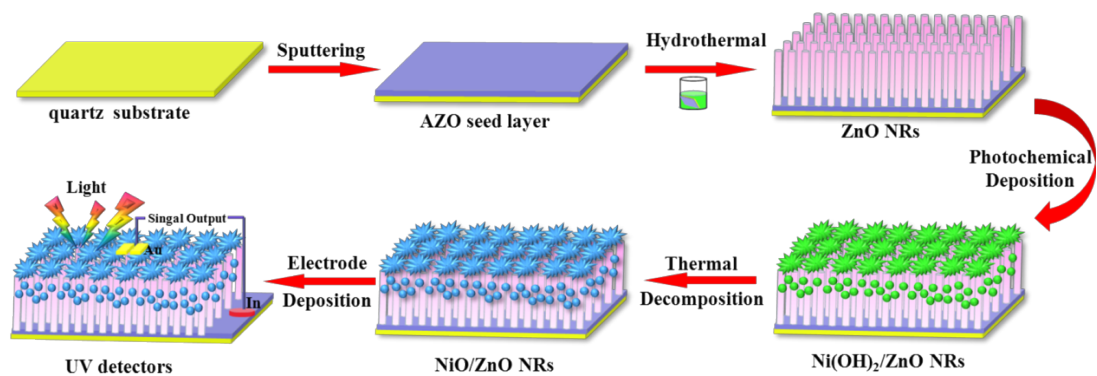

**Scheme S1.** Schematic illustration of the fabrication of honeycomb-like NiO/ZnO heterostructure UV photodetector.

## Supporting Information II: Optical images

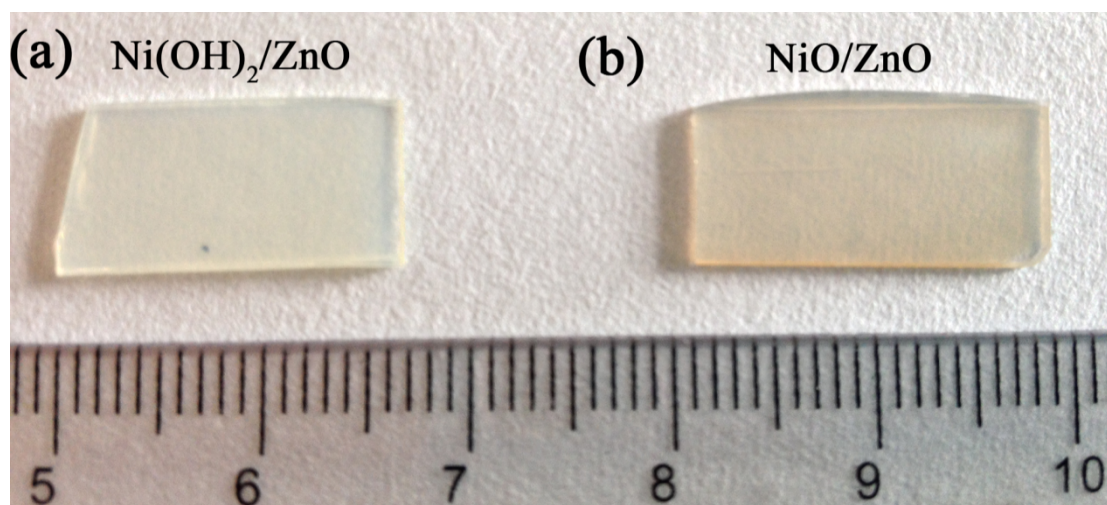

**Figure S1.** Optical images of (a) precursor  $\text{Ni(OH)}_2/\text{ZnO}$  and (b)  $\text{NiO}/\text{ZnO}$  heterostructures.

### Supporting Information III: UV light source details

The employed light source for UV detection is UVA-LED (peak ~ 365 nm, LUYOR-365, LUYOR®). Furthermore, the UV light source has been filtered to block the disturbance of other lights (see below). The irradiation of UVA-LED is filtered by Integral Clear Filter (built in, bandpass filter 355 ~ 375 nm).

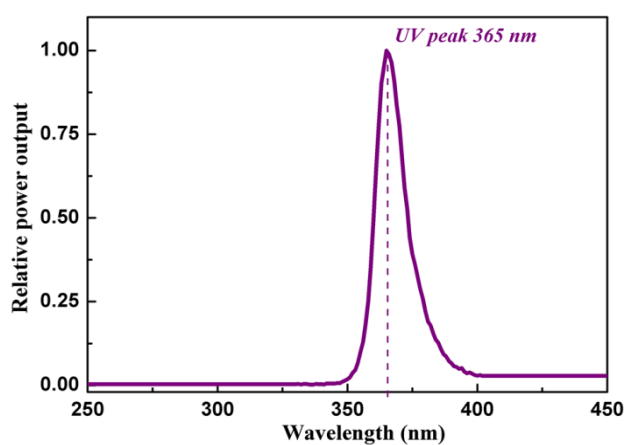

**Figure S2.** Relative spectral power output for UV light.

**Supporting Information IV: SEM images of ZnO NRs before and after annealing in air at 500 °C**

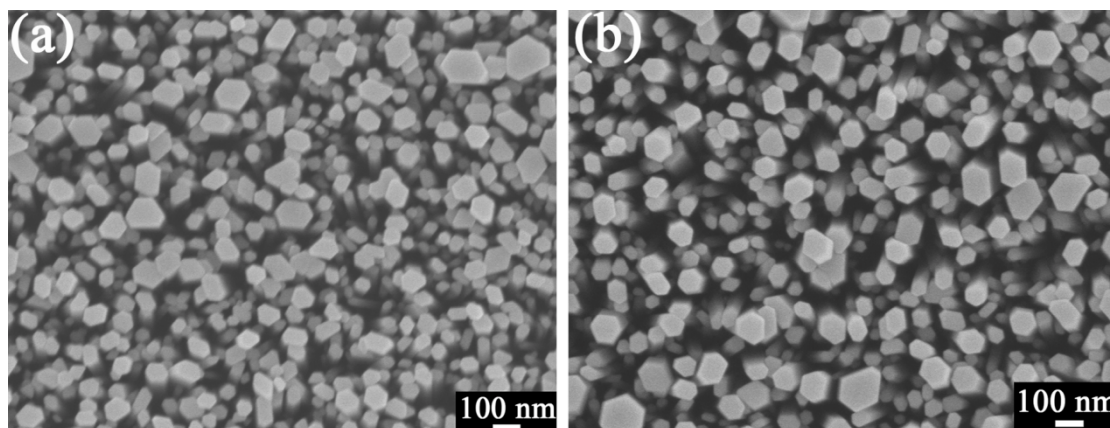

**Figure S3.** SEM images of ZnO NRs: (a) as-grown ZnO NRs. (b) ZnO NRs after annealing in air at 500 °C.

**Supporting Information V: SEM images of Ni(OH)<sub>2</sub>/ZnO NRs precursor prepared at different Ni<sup>2+</sup> ion concentrations**

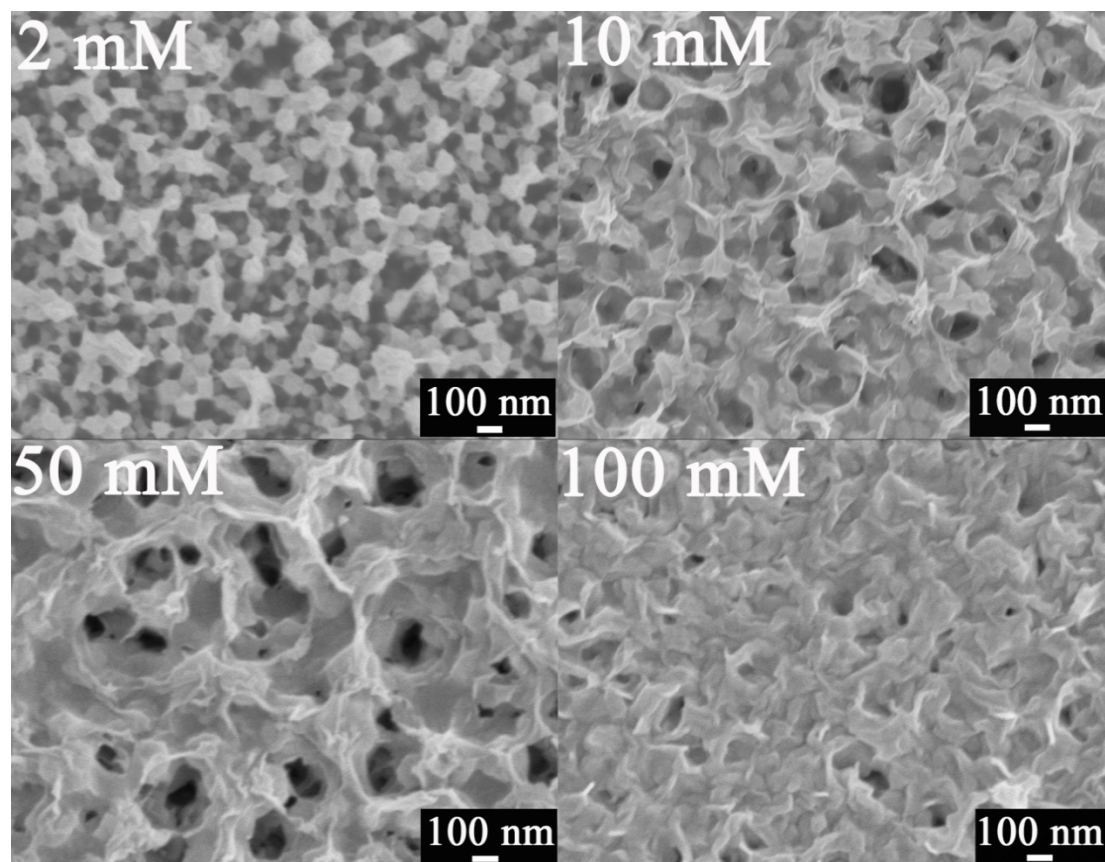

**Figure S4.** SEM images of the Ni(OH)<sub>2</sub>/ZnO NRs precursor prepared at different Ni<sup>2+</sup> ion concentrations. For all samples, UV irradiation time was fixed at 12 h.

## Supporting Information VI: $I$ - $V$ characteristics of bare ZnO NRs

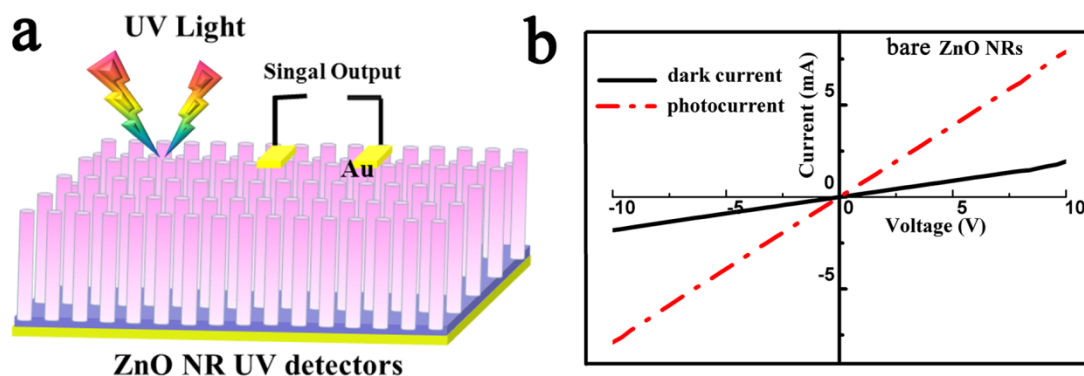

**Figure S5.** (a) The schematic diagram of the bare ZnO NRs based UV detectors; (b)  $I$ - $V$  characteristics of bare ZnO NRs under dark and 365 nm UV illumination conditions.
